# Supplementary material
Source: publisher figshare collection journal article supplement (https://acs.figshare.com/ndownloader/files/24159246)
Supplement: Supplementary file 1 [file 24159246]

## Sheet: Table S1
Table S1. List of m/z values of the inclusion list.
m/z	Peptide sequence	Peptide modification
364.517	LDDKDPNFK
366.237	GTTVLLK
419.558	KADETQALPQR
421.208	GVYYPDK
423.729	MKDLSPR
424.718	VCVDTVR
430.746	IAGHHLGR
431.726	MKDLSPR
438.743	EITVATSR
440.754	HINAQVAK
441.219	RVDFCGK
443.706	GFYAEGSR
443.719	IADYNYK
456.218	CYGVSPTK
462.256	KKADETQALPQR
475.283	HTPINLVR
475.774	HTPINLVR	N-->Q
490.767	HGGGVAGALNK
493.288	LKVDTANPK
494.76	CDIKDLPK
495.772	SNLKPFER
546.272	LDDKDPNFK
564.786	ADETQALPQR
577.763	MSECVLGQSK
593.825	EIDRLNEVAK
628.833	KADETQALPQR
692.881	KKADETQALPQR
699.862	VGGSCVLSGHNLAK
